# Supplementary material
Source: PubMed Central journal article supplement (PMC1413786)

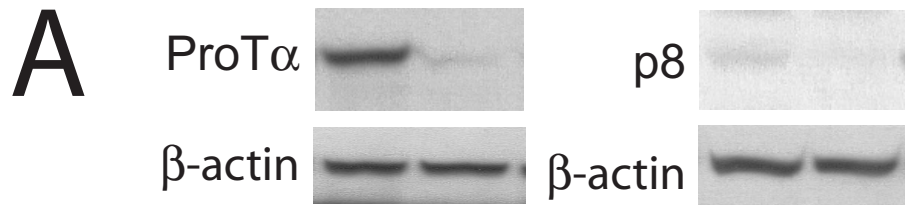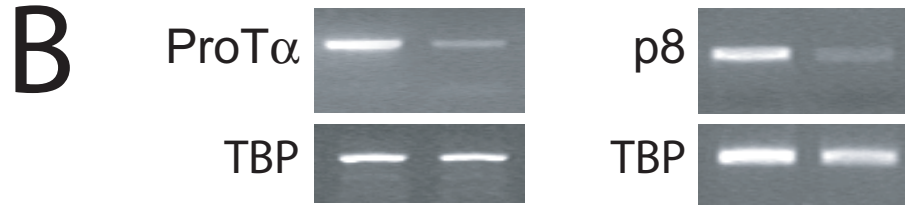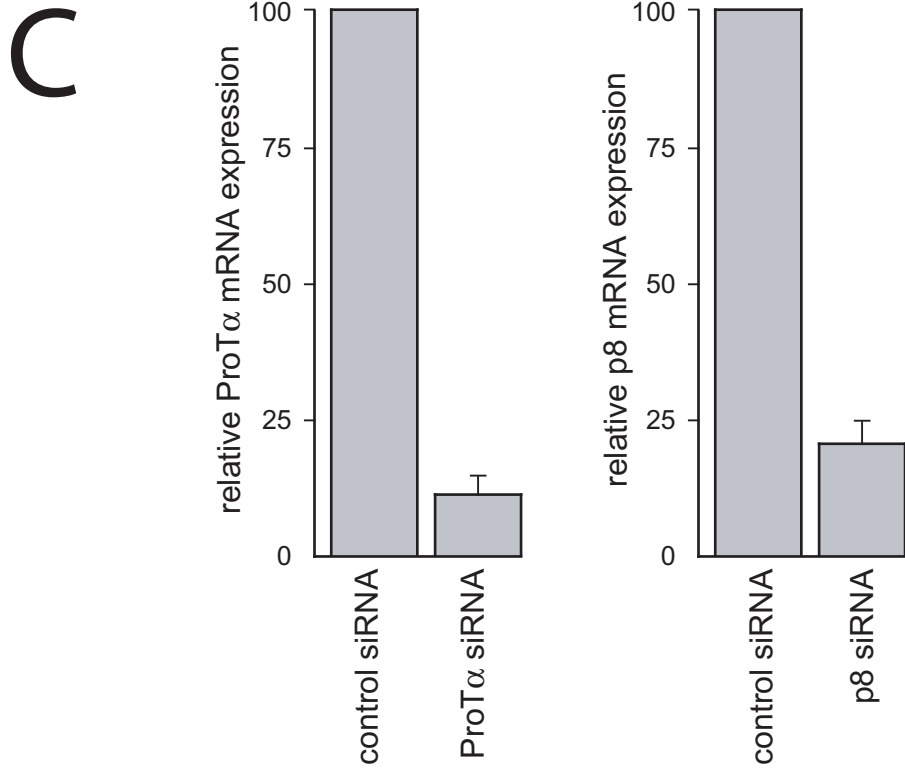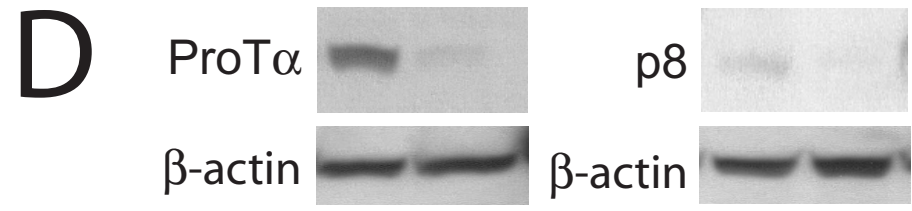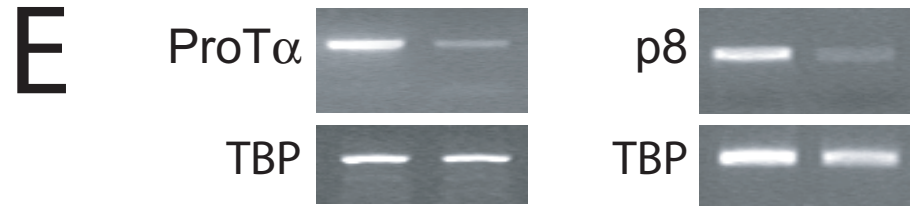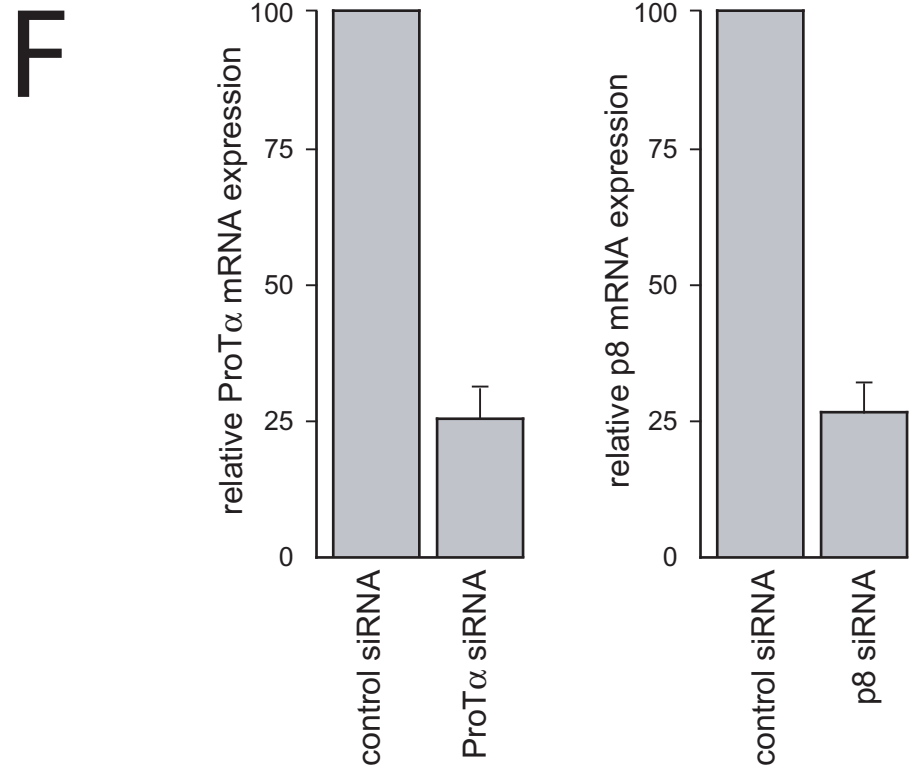

Supplement: pnas_0508955103_1.pdf [file pnas_0508955103_1.pdf]

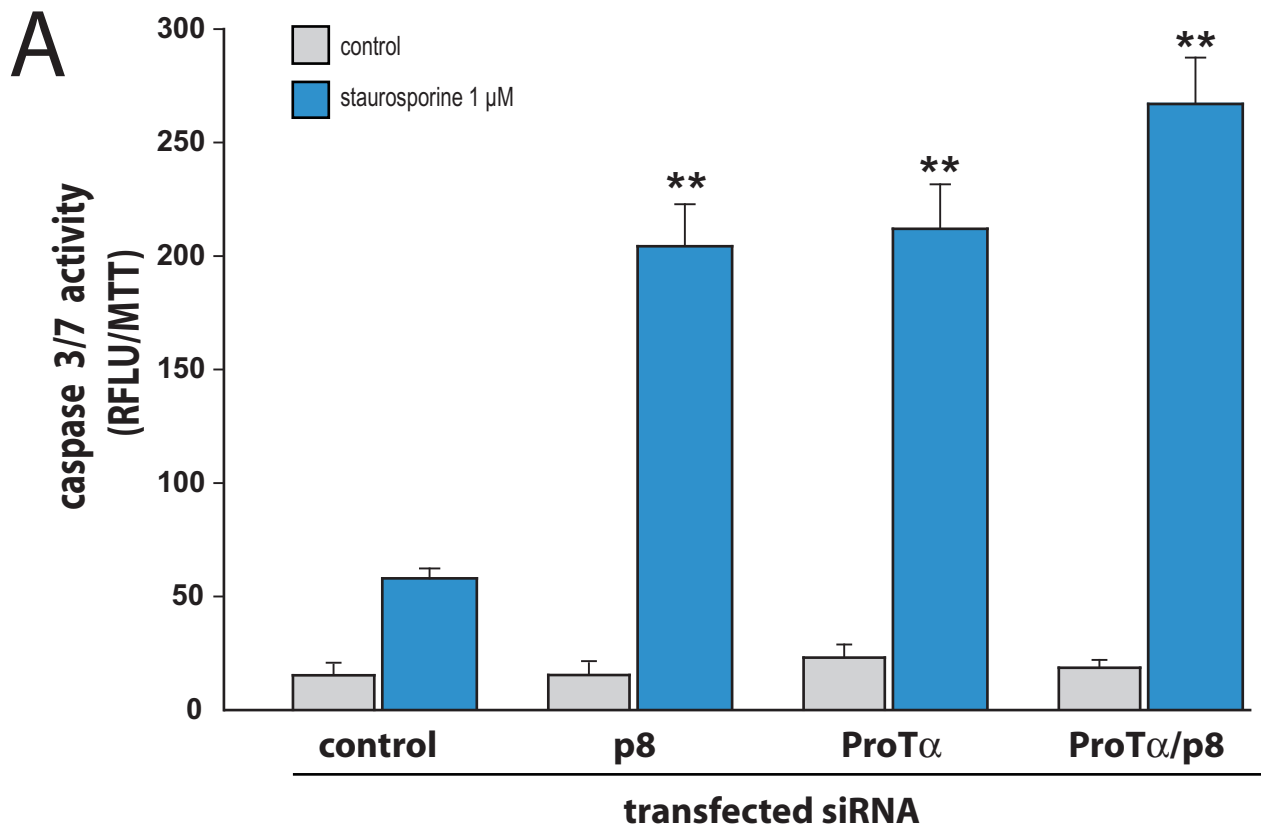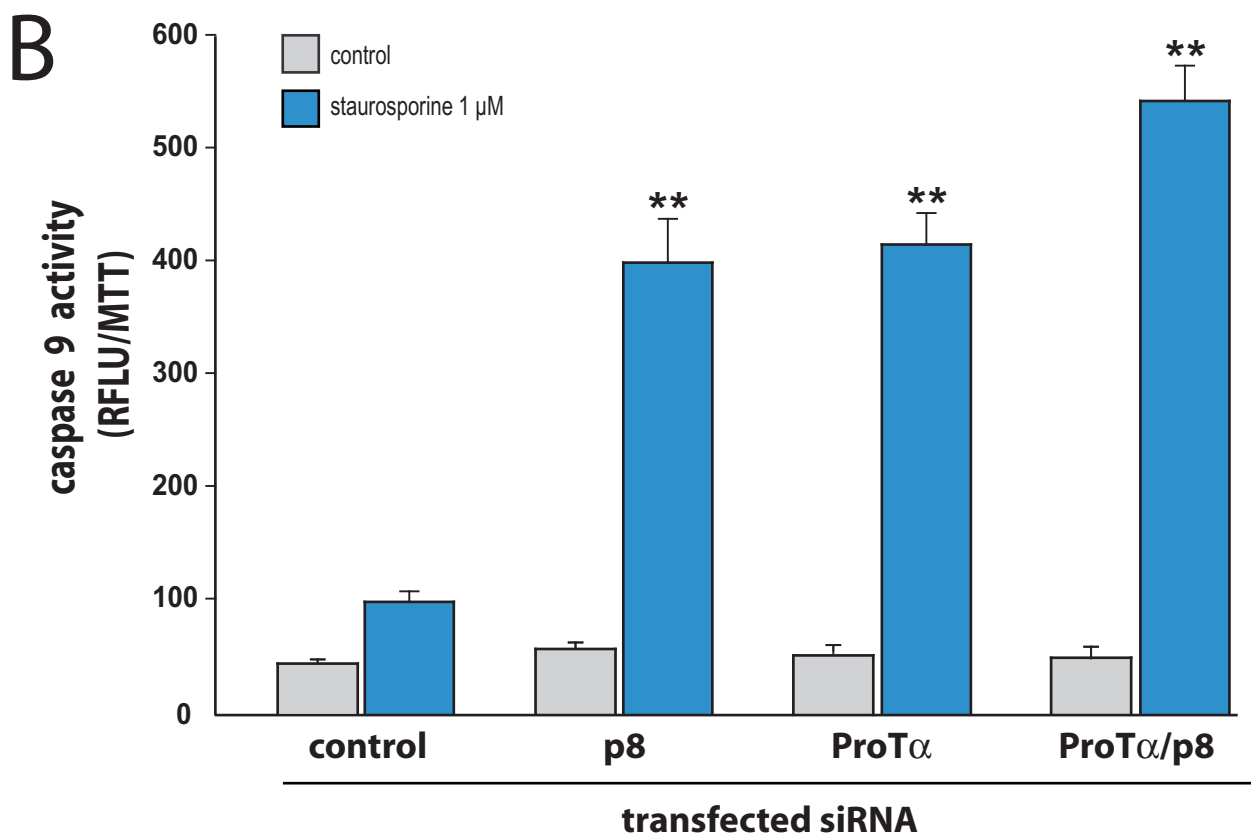

Supplement: pnas_0508955103_2.pdf [file pnas_0508955103_2.pdf]
